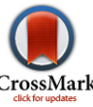

# The Impact of Delayed Chemotherapy on Its Completion and Survival Outcomes in Stage II Colon Cancer Patients

Fang Xu<sup>1,2\*</sup>, Alfred A. Rimm<sup>1</sup>, Pingfu Fu<sup>1,4</sup>, Smitha S. Krishnamurthi<sup>3,4</sup>, Gregory S. Cooper<sup>2,4</sup>

**1** Department of Epidemiology and Biostatistics, Case Western Reserve University School of Medicine, Cleveland, Ohio, United States of America, **2** Department of Gastroenterology, University Hospitals Case Medical Center, Cleveland, Ohio, United States of America, **3** Division of Hematology and Oncology, Case Western Reserve University School of Medicine, Cleveland, Ohio, United States of America, **4** Case Comprehensive Cancer Center, Case Western Reserve University, Cleveland, Ohio, United States of America

## Abstract

**Background:** Delayed chemotherapy is associated with inferior survival in stage III colon and stage II/III rectal cancer patients, but similar studies have not been performed in stage II colon cancer patients. We investigate the association between delayed and incomplete chemotherapy, and the association of delayed chemotherapy with survival in stage II colon cancer patients.

**Patients and Methods:** Patients (age  $\geq 66$ ) diagnosed as stage II colon cancer and received chemotherapy from 1992 to 2005 were identified from the linked SEER-Medicare database. The association between delayed and incomplete chemotherapy was assessed using unconditional and conditional logistic regressions. Survival outcomes were assessed using stratified Cox regression based on propensity score matched samples.

**Results:** 4,209 stage II colon cancer patients were included, of whom 73.0% had chemotherapy initiated timely ( $\leq 2$  months after surgery), 14.7% had chemotherapy initiated with moderate delay (2–3 months), and 12.3% had delayed chemotherapy ( $\geq 3$  months). Delayed chemotherapy was associated with not completing chemotherapy (adjusted odds ratio (OR): 1.33 (95% confidence interval: 1.11, 1.59) for moderately delayed group, adjusted OR: 2.60 (2.09, 3.24) for delayed group). Delayed chemotherapy was associated with worse survival outcomes (hazard ratio (HR): 1.75 (1.29, 2.37) for overall survival; HR: 4.23 (2.19, 8.20) for cancer-specific survival).

**Conclusion:** Although the benefit of chemotherapy is unclear in stage II colon cancer patients, delay in initiation of chemotherapy is associated with an incomplete chemotherapy course and poorer survival, especially cancer-specific survival. Causal inference in the association between delayed initiation of chemotherapy and inferior survival requires further investigation.

**Citation:** Xu F, Rimm AA, Fu P, Krishnamurthi SS, Cooper GS (2014) The Impact of Delayed Chemotherapy on Its Completion and Survival Outcomes in Stage II Colon Cancer Patients. PLoS ONE 9(9): e107993. doi:10.1371/journal.pone.0107993

**Editor:** Chi Zhang, University of Texas Southwestern Medical Center, United States of America

**Received:** July 6, 2014; **Accepted:** August 14, 2014; **Published:** September 19, 2014

**Copyright:** © 2014 Xu et al. This is an open-access article distributed under the terms of the Creative Commons Attribution License, which permits unrestricted use, distribution, and reproduction in any medium, provided the original author and source are credited.

**Data Availability:** The authors confirm that, for approved reasons, some access restrictions apply to the data underlying the findings. The original databases are linked SEER-Medicare data from National Cancer Institute. The authors signed a Data User Agreement (DUA), and thus cannot make the data publicly available. However if an interested researcher wants to obtain the data please contact the corresponding author, Fang Xu, youlindi@gmail.com who will direct the reader to obtain the data in the same manner that the authors did.

**Funding:** The authors have no support or funding to report.

**Competing Interests:** The authors have declared that no competing interests exist.

\* Email: youlindi@gmail.com

## Introduction

Current guidelines from American Society of Clinical Oncology (ASCO) and National Comprehensive Cancer Network (NCCN) suggest chemotherapy use in stage III, high-risk stage II colon, and stages II and III colorectal cancer patients [1,2]. However, the guidelines don't specify the appropriate timing of chemotherapy initiation after surgery. In clinical trials, initiation ranged from 35 days [3] to 6 weeks [4], and intervals of longer than 8 weeks after surgery were associated with worse survival [5,6]. In addition, a meta-analysis study suggested that delaying chemotherapy over 2 months after surgery could be deleterious to survival [7]. Another recent meta-analysis indicated a decrease in

relative overall survival by 14% for every 4 weeks' delay to initiation of chemotherapy [8].

There has been a dearth of research about delayed chemotherapy and the survival outcomes. To our knowledge, no large-database study has assessed the effect of delay in stage II colon cancer patients alone, given the fact that the effectiveness of chemotherapy is not as clear as stage III patients. Nonetheless, 20% of stage II patients still received post-surgical chemotherapy [9]. Due to ethical issues, it is infeasible to design a randomized clinical trial to study the impact of delayed therapy on survival and chemotherapy completion, and thus, well-designed retrospective studies are the best option to address this question.

## Materials and Methods

### Study population

The study utilized the linked Surveillance, Epidemiology, and End Results (SEER)–Medicare database. Detailed description of the database has been previously published [10,11]. The study population included patients residing in the geographic areas served by SEER registries who were 66 years and older diagnosed with adenocarcinoma of the colon between 1992 and 2005, and were treated with surgical resection. Patients were excluded if they enrolled in Medicare who were disabled or had end-stage renal diseases, had a history of prior cancer, were diagnosed from autopsy or death certificate only, or had a second cancer diagnosis within 1 year after colon cancer diagnosis due to the possibility of affecting the use of chemotherapy. The study was limited to only patients with American Joint Committee on Cancer (AJCC) stage II. In order to ensure complete claims, patients were included if they were enrolled in Medicare Part A and B 12 months prior to and 18 months after the cancer or until death. During this enrollment period, patients were excluded if they enrolled in a Health Maintenance Organization (HMO). Furthermore, exclusion criteria included colon resection more than 3 months after cancer diagnosis, or death occurrence within 3 months of surgery. Surgical codes were identified using Medicare inpatient, outpatient and Carrier files [12,13]. Lastly, patients who never received 5-FU based chemotherapy within 1 year of cancer diagnosis were excluded.

### Measures

Chemotherapy initiation after surgery was categorized into <2 months (timely), 2–3 months (moderately delayed) and  $\geq 3$  months (delayed), which is consistent with the time frame of previous SEER–Medicare studies [14,15]. Completion of chemotherapy was defined as 5 subsequent consecutive months of chemotherapy in which there was at least 1 chemotherapy claim. In order to avoid misclassifying the treatment for cancer recurrence (CPT-4 code: 36246-7, 47120, 47122, 47125, 47130, 47370-1, 47380-2, 76362, 76394, 76490, 36260, 47100; ICD-9 procedure code: 50.20-2, 50.29, 50.3, 50.4; ICD-9 diagnosis code: 197.7, 197.0-3, 197.8, 198.3-5, 198.41, 198.45, 198.48, 198.51, 197.04, 197.08), the claims were only considered for the primary cancer treatment, which began with the first claim date for surgery or chemotherapy after diagnosis, and ended with the claim date after which there were 3 months with no colon cancer treatment, or a cancer recurrence, or 9 months after diagnosis whichever came first. By doing so, chemotherapy wouldn't be misclassified for cancer recurrence. This algorithm was developed and validated using SEER–Medicare databases [16] and used by other Medicare studies [17–19]. The chemo agent was 5-FU based. ICD-9, CPT/HCPCS codes, and NDC (National Drug Code) are presented in the tables S1 and S2.

Based on the information obtained from the databases, time-to-event was from month of cancer diagnosis through 2002 for overall survival and through 2000 for cancer-specific survival, in order to achieve a complete 5-year survival of follow-up. Overall survival time was defined as the cancer diagnosis date till all-cause death or the end of the follow-up date, 12/31/2007. For cancer-specific survival, survival time was defined as the cancer diagnosis date till colon cancer-specific death or the end of the follow-up date, 12/31/2005. Patients were censored if they were alive at the end of the study period or died of causes other than colon cancer. For non-cancer-specific survival, patients were censored if they were alive at 12/31/2005 or died of colon cancer.

Patients' demographics included age categories (66–69, 70–74, 75–79, 80–84, 85+), gender; race categorized as white, African American, and other; and marital status. Geographic regions were categorized as Midwest, Northeast, South, and West. Residential areas included metropolitan, suburban, and rural. Socioeconomic status (SES) included percentage of non-English speakers, percentage of persons with at least a high school diploma, and median income, all at census tract level. Cancer-related variables were obtained from SEER data, including T stage, tumor grade, presence of perforation or obstruction at disease presentation, and inadequately sampled lymph nodes (<12). Comorbid conditions were measured by Deyo-adapted Charlson index using the Klabunde rule-out algorithm [20]. Charlson conditions including neoplasm were excluded because of the correlation with the primary diagnosis of cancer. We searched the conditions from 1 year to 30 days prior to the cancer diagnosis to warrant preexisting conditions. The number of comorbidities was then categorized as 0, 1, 2, and  $\geq 3$ . The other variables included hospitalization, oxygen use, and wheelchair use within 1 year prior to cancer diagnosis, length of hospital stay, and postsurgical hospital readmission.

### Analysis

For descriptive analysis, patients' demographic and clinical information was compared among groups of timing of chemotherapy (timely, moderately delayed, delayed), using mean  $\pm$  standard deviation if continuous variables were normally distributed, median with interquartile range if the continuous variables were not normally distributed, and frequencies with proportions if variables were categorical. The group comparison was based on Kruskal Wallis for continuous variables and Pearson  $\chi^2$  tests for categorical variables. Logistic regressions were performed to predict delayed chemotherapy, adjusting for patients' demographics, socioeconomics, and clinical variables. The association of timing of initiation of chemotherapy with incompleteness of chemotherapy was assessed by unadjusted and adjusted logistic regressions. To balance the characteristics of the chemotherapy treatment groups, and to reduce the selection bias by the factors that affected the timing of receiving chemotherapy, which inherently affected the treatment outcomes, we used a propensity score matching algorithm. The propensity score was applied to generate one-to-one matched samples, one matched sample for  $\geq 3$  months and <3 months, and the other for  $\geq 2$  months and <2 months, by all the aforementioned variables using one-to-one greedy matching technique [21]. Conditional logistic regressions were then fit to assess the association between timing of initiation and incompleteness of chemotherapy. For survival analysis, propensity score was generated in the study sample to predict the likelihood of delayed chemotherapy ( $\geq 3$  months) versus the others. One-to-one matching algorithm was then applied in the survival samples. Kaplan-Meier survival curves were generated for overall, cancer-specific, and non-cancer-specific survivals by timing of the chemotherapy groups. Stratified Cox models with strata of matching sets were constructed to compare the matched groups. We then assessed the likelihood of the modification of incomplete chemotherapy on survival. All analyses were performed using statistical software SAS 9.2 (SAS Institute, Inc., Cary, NC) and R 2.9.2 (R project for statistical computing).

This study was approved by the Institutional Review Board of University Hospital Case Medical Center.

**Table 1.** Patient characteristics by the time of chemotherapy initiation.

| Characteristics                                          | All sample<br>4,209 (100%)<br>N(%) | Chemotherapy<br>initiated ≤2 months<br>from surgery (timely)<br>3,071 (73.0%) N(%) | Chemotherapy initiated<br>2–3 months from surgery<br>(moderately delayed) 619<br>(14.7%) N(%) | Chemotherapy<br>initiated<br>≥3 months from<br>surgery (delayed)<br>519 (12.3%) N(%) | p-value |
|----------------------------------------------------------|------------------------------------|------------------------------------------------------------------------------------|-----------------------------------------------------------------------------------------------|--------------------------------------------------------------------------------------|---------|
| <b>Demographics</b>                                      |                                    |                                                                                    |                                                                                               |                                                                                      |         |
| Age at diagnosis                                         |                                    |                                                                                    |                                                                                               |                                                                                      | <0.001  |
| 66–69                                                    | 1,113 (26.5)                       | 845 (27.5)                                                                         | 162 (26.2)                                                                                    | 106 (20.4)                                                                           |         |
| 70–74                                                    | 1,394 (33.1)                       | 1,032 (33.6)                                                                       | 226 (36.5)                                                                                    | 136 (26.2)                                                                           |         |
| 75–79                                                    | 1,141 (27.1)                       | 828 (27.0)                                                                         | 157 (25.4)                                                                                    | 156 (30.1)                                                                           |         |
| 80–84                                                    | 442 (10.5)                         | 306 (10.0)                                                                         | Note                                                                                          | 79 (5.2)                                                                             |         |
| 85+                                                      | 119 (2.8)                          | 60 (1.9)                                                                           | Note                                                                                          | 42 (8.1)                                                                             |         |
| Gender                                                   |                                    |                                                                                    |                                                                                               |                                                                                      | 0.95    |
| Female                                                   | 2,255 (53.6)                       | 1,646 (53.6)                                                                       | 334 (54.0)                                                                                    | 275 (53.0)                                                                           |         |
| Male                                                     | 1,954 (46.4)                       | 1,425 (46.4)                                                                       | 285 (46.0)                                                                                    | 244 (47.0)                                                                           |         |
| Race                                                     |                                    |                                                                                    |                                                                                               |                                                                                      | 0.01    |
| White                                                    | 3,575 (84.9)                       | 2,638 (85.9)                                                                       | 509 (82.2)                                                                                    | 428 (82.5)                                                                           |         |
| Black                                                    | 219 (5.2)                          | 139 (4.5)                                                                          | 42 (6.8)                                                                                      | 38 (7.3)                                                                             |         |
| Others                                                   | 415 (9.9)                          | 294 (9.6)                                                                          | 68 (11.0)                                                                                     | 53 (10.2)                                                                            |         |
| Marital status                                           |                                    |                                                                                    |                                                                                               |                                                                                      | 0.06    |
| Married                                                  | 2,585 (61.4)                       | 1,921 (62.6)                                                                       | 372 (60.1)                                                                                    | 292 (56.3)                                                                           |         |
| Not married                                              | 1,503 (35.7)                       | 1,061 (34.5)                                                                       | Note                                                                                          | Note                                                                                 |         |
| Unknown                                                  | 121 (2.9)                          | 89 (2.9)                                                                           | Note                                                                                          | Note                                                                                 |         |
| SEER regions                                             |                                    |                                                                                    |                                                                                               |                                                                                      | <0.001  |
| Midwest                                                  | 1,072 (25.5)                       | 834 (27.2)                                                                         | 141 (22.8)                                                                                    | 97 (18.7)                                                                            |         |
| Northeast                                                | 846 (20.1)                         | 579 (18.8)                                                                         | 141 (22.8)                                                                                    | 126 (24.3)                                                                           |         |
| South                                                    | 615 (14.6)                         | 441 (14.4)                                                                         | 87 (14.0)                                                                                     | 87 (16.7)                                                                            |         |
| West                                                     | 1,676 (39.8)                       | 1,217 (39.6)                                                                       | 250 (40.4)                                                                                    | 209 (40.3)                                                                           |         |
| Residential places                                       |                                    |                                                                                    |                                                                                               |                                                                                      | 0.30    |
| Metropolitan                                             | 3,529 (83.8)                       | 2,559 (83.3)                                                                       | 522 (84.3)                                                                                    | 448 (86.3)                                                                           |         |
| Urban                                                    | 599 (14.2)                         | 456 (14.9)                                                                         | Note                                                                                          | Note                                                                                 |         |
| Rural                                                    | 81 (1.9)                           | 56 (1.8)                                                                           | Note                                                                                          | Note                                                                                 |         |
| <b>SES at census tract</b>                               |                                    |                                                                                    |                                                                                               |                                                                                      |         |
| Median income (\$)                                       | 42,000 (31,570,<br>57,170)         | 41,708 (31,518,<br>56,454)                                                         | 42,363 (31,900,<br>56,798)                                                                    | 42,476 (31,014,<br>60,367)                                                           | 0.46    |
| At least high school<br>diploma (%)                      | 83.6 (74.6, 90.3)                  | 83.7 (74.9, 90.3)                                                                  | 83.0 (73.4, 89.9)                                                                             | 83.8 (73.6, 90.8)                                                                    | 0.44    |
| Not well spoken<br>English at age 65+ (%)                | 1.5 (0, 5.1)                       | 1.4 (0, 4.8)                                                                       | 1.8 (0, 5.7)                                                                                  | 1.8 (0, 5.5)                                                                         | 0.03    |
| Year of diagnosis                                        |                                    |                                                                                    |                                                                                               |                                                                                      | <0.001  |
| 1992–1995                                                | 923 (21.9)                         | 722 (23.5)                                                                         | 97 (15.7)                                                                                     | 104 (20.0)                                                                           |         |
| 1996–1999                                                | 909 (21.6)                         | 685 (22.3)                                                                         | 131 (21.1)                                                                                    | 93 (17.9)                                                                            |         |
| 2000–2002                                                | 1,366 (32.5)                       | 998 (32.5)                                                                         | 229 (37.0)                                                                                    | 139 (26.8)                                                                           |         |
| 2003–2005                                                | 1,011 (24.0)                       | 666 (21.7)                                                                         | 162 (26.2)                                                                                    | 183 (35.3)                                                                           |         |
| <b>High-risk prognostic factors</b>                      |                                    |                                                                                    |                                                                                               |                                                                                      |         |
| T4                                                       | 817 (19.4)                         | 591 (19.2)                                                                         | 125 (20.2)                                                                                    | 101 (19.5)                                                                           | 0.86    |
| Poorly differentiated or<br>undifferentiated tumor grade | 813 (19.3)                         | 585 (19.1)                                                                         | 119 (19.2)                                                                                    | 109 (21.0)                                                                           | 0.58    |
| Obstruction                                              | 271 (6.4)                          | 194 (6.3)                                                                          | 40 (6.5)                                                                                      | 37 (7.1)                                                                             | 0.78    |
| Perforation                                              | 203 (4.8)                          | 138 (4.5)                                                                          | 32 (5.2)                                                                                      | 33 (6.4)                                                                             | 0.17    |
| <12 lymph node examined                                  | 2,215 (52.6)                       | 1,599 (52.1)                                                                       | 324 (52.3)                                                                                    | 292 (56.3)                                                                           | 0.21    |
| <b>Pre-diagnostic conditions</b>                         |                                    |                                                                                    |                                                                                               |                                                                                      |         |
| Charlson Index                                           |                                    |                                                                                    |                                                                                               |                                                                                      | 0.002   |

**Table 1. Cont.**

| Characteristics                 | All sample<br>4,209 (100%)<br>N(%) | Chemotherapy<br>initiated $\leq$ 2 months<br>from surgery (timely)<br>3,071 (73.0%) N(%) | Chemotherapy initiated<br>2–3 months from surgery<br>(moderately delayed) 619<br>(14.7%) N(%) | Chemotherapy<br>initiated<br>$\geq$ 3 months from<br>surgery (delayed)<br>519 (12.3%) N(%) | p-value |
|---------------------------------|------------------------------------|------------------------------------------------------------------------------------------|-----------------------------------------------------------------------------------------------|--------------------------------------------------------------------------------------------|---------|
| 0                               | 3,033 (72.1)                       | 2,256 (73.5)                                                                             | 429 (69.3)                                                                                    | 348 (67.0)                                                                                 |         |
| 1                               | 813 (19.3)                         | 584 (19.0)                                                                               | 123 (19.9)                                                                                    | 106 (20.4)                                                                                 |         |
| 2                               | 252 (6.0)                          | 159 (5.2)                                                                                | Note                                                                                          | Note                                                                                       |         |
| 3+                              | 111 (2.6)                          | 72 (2.3)                                                                                 | Note                                                                                          | Note                                                                                       |         |
| Hospitalization                 | 553 (13.1)                         | 393 (12.8)                                                                               | 85 (13.7)                                                                                     | 75 (14.5)                                                                                  | 0.53    |
| Oxygen or wheelchair use        | 60 (1.4)                           | 38 (1.2)                                                                                 | Note                                                                                          | Note                                                                                       | 0.21    |
| <b>Post-surgical conditions</b> |                                    |                                                                                          |                                                                                               |                                                                                            |         |
| Length of hospital stay         |                                    |                                                                                          |                                                                                               |                                                                                            | <0.001  |
| $\leq$ 14 days                  | 3,768 (89.5)                       | 2,832 (92.2)                                                                             | 512 (82.7)                                                                                    | 424 (81.7)                                                                                 |         |
| >14 days                        | 441 (10.5)                         | 239 (7.8)                                                                                | 107 (17.3)                                                                                    | 95 (18.3)                                                                                  |         |
| Hospital readmission            |                                    |                                                                                          |                                                                                               |                                                                                            | <0.001  |
| 0                               | 3,450 (82.0)                       | 2,721 (88.6)                                                                             | 445 (71.9)                                                                                    | 284 (54.7)                                                                                 |         |
| 1                               | 607 (14.4)                         | 322 (10.5)                                                                               | 138 (22.3)                                                                                    | 147 (28.3)                                                                                 |         |
| 2+                              | 152 (3.6)                          | 28 (0.9)                                                                                 | 36 (5.8)                                                                                      | 88 (17.0)                                                                                  |         |

Note: Small numbers are suppressed.  
doi:10.1371/journal.pone.0107993.t001

## Results

The initial colon cancer sample included 194,546 patients. Patients were excluded sequentially if they had end stage renal disease (ESRD) or were disabled (6.2%), had a prior cancer diagnosis (7.7%), had histology other than adenocarcinoma (6.3%), developed any secondary cancer within 1 year of cancer diagnosis (2.9%), were diagnosed from autopsy or death certificate (0.2%), were diagnosed before 1992 (6.3%), were younger than 66 years old (14.5%), had incomplete Medicare or HMO enrollment (51.7%), had stages other than AJCC stage II (65.1%), didn't undergo surgery within 3 months after cancer diagnosis (3.3%), had missing covariates of interest (2.3%), and received preoperative chemotherapy or radiation therapy or died within 3 months of surgery (0.3%). Finally, patients not receiving 5-FU based chemotherapy within 1 year of cancer diagnosis were excluded from the sample (78.3%). The final sample included 4,209 patients.

Patient characteristics according to the timing of chemotherapy (timely: 73.0%, moderately delayed: 14.7%, and delayed: 12.3%) are shown in Table 1. The median age was 73.6 years with the interquartile range of 69.8 and 77.6 (results not shown), 84.9% were white, and 5.2% were black. Compared to others, patients who received timely chemotherapy were more likely to be younger, white, and residing in the Midwestern US. Patients' diagnosis later than 2002 was more likely to be associated with the delayed group. SES at census tract had no association with the timing of chemotherapy initiation. Other clinical characteristics associated with timely initiation were lower Charlson score, and no postsurgical hospital readmission. High-risk prognostic factors were not associated with timing of initiation. The results of logistic regressions predicting delayed chemotherapy are presented in Table 2. Age, SEER region, and readmission to the hospital were strong predictors. The other variables associated with delayed chemotherapy were African American race, a colon cancer

diagnosis after 2002, length of hospital stay  $\geq$ 14 days, and a Charlson comorbidity score of 2.

The unadjusted model showed that patients in the moderately delayed group had 36% higher odds of not completing chemotherapy than those in the timely group (Table 3). Patients in the delayed group had 2.72 times higher likelihood of not completing chemotherapy. After adjusting for the confounders, the results did not change appreciably. Using 3 months as a cutoff point of delayed chemotherapy, we conducted the propensity score matching analysis. The sample size was 964 in total, in other words, 482 pairs in patients undergoing chemotherapy within and after 3 months. For each matched sample, the distributions of the propensity scores had decent overlaps comparing the groups. Additionally, there was no statistical difference between the matched groups in terms of the patient characteristics, which indicates the appropriate use of propensity matching algorithm. The conditional logistic regression showed that patients in the delayed group had 2.45 times higher likelihood of not completing chemotherapy than their counterparts. When the cutoff was 2 months, patients initiating chemotherapy  $\geq$ 2 months had 68% higher odds of not completing chemotherapy ( $n = 1,996$ ).

For survival analysis, two samples were generated, one for overall survival ( $n = 3,198$ ) and the other for cancer-specific survival ( $n = 2,320$ ). For exploratory analysis purpose, the unadjusted Kaplan-Meier curves were plotted. There was an overall significant difference among the 4 strata (chemotherapy initiated  $<$ 3 months and completed, chemotherapy initiated  $<$ 3 months but not completed, chemotherapy initiated  $\geq$ 3 months and completed, and chemotherapy initiated  $\geq$ 3 months but not completed) for both overall and cancer-specific survivals (both log-rank tests:  $p$ -value $<$ 0.001, results not shown). Patients who initiated chemotherapy  $<$ 3 months and completed the treatment had the best survival, those who had delayed chemotherapy ( $\geq$ 3 months) and didn't complete chemotherapy regimen had the poorest survival. In addition, the timing of chemotherapy had a

**Table 2.** Association of patient characteristics with the odds of delayed chemotherapy ( $\geq 3$  months).

| Characteristics                                       | Unadjusted OR (95% CI) | p-value | Adjusted OR (95% CI) | p-value |
|-------------------------------------------------------|------------------------|---------|----------------------|---------|
| <b>Demographics</b>                                   |                        |         |                      |         |
| Age at diagnosis                                      |                        |         |                      |         |
| 66–69 (ref)                                           | 1                      | –       | 1                    | –       |
| 70–74                                                 | 1.03 (0.79, 1.34)      | 0.84    | 1.02 (0.77, 1.35)    | 0.90    |
| 75–79                                                 | 1.51 (1.16, 1.20)      | 0.002   | 1.44 (1.09, 1.90)    | 0.01    |
| 80–84                                                 | 2.07 (1.51, 2.83)      | <0.001  | 1.76 (1.25, 2.48)    | 0.001   |
| 85+                                                   | 5.18 (3.39, 7.93)      | <0.001  | 3.55 (2.20, 5.71)    | <0.001  |
| Gender                                                |                        |         |                      |         |
| Female (ref)                                          | 1                      | –       | 1                    | –       |
| Male                                                  | 1.03 (0.86, 1.24)      | 0.77    | 1.03 (0.84, 1.27)    | 0.77    |
| Race                                                  |                        |         |                      |         |
| White (ref)                                           | 1                      | –       | 1                    | –       |
| Black                                                 | 1.54 (1.07, 2.22)      | 0.02    | 1.68 (1.10, 2.55)    | 0.02    |
| Others                                                | 1.08 (0.79, 1.46)      | 0.64    | 1.16 (0.79, 1.69)    | 0.46    |
| Marital status                                        |                        |         |                      |         |
| Married (ref)                                         | 1                      | –       | 1                    | –       |
| Not married                                           | 1.30 (1.08, 1.58)      | 0.01    | 1.05 (0.84, 1.31)    | 0.68    |
| Unknown                                               | 0.95 (0.53, 1.70)      | 0.85    | 0.74 (0.39, 1.41)    | 0.37    |
| SEER regions                                          |                        |         |                      |         |
| Midwest (ref)                                         | 1                      | –       | 1                    | –       |
| Northeast                                             | 1.76 (1.33, 2.33)      | <0.001  | 1.41 (1.01, 1.95)    | 0.04    |
| South                                                 | 1.66 (1.22, 2.25)      | 0.001   | 1.71 (1.20, 2.42)    | 0.003   |
| West                                                  | 1.43 (1.11, 1.85)      | 0.01    | 1.32 (0.98, 1.78)    | 0.07    |
| Residential places                                    |                        |         |                      |         |
| Metropolitan (ref)                                    | 1                      | –       | 1                    | –       |
| Urban                                                 | 0.77 (0.58, 1.02)      | 0.07    | 0.92 (0.66, 1.28)    | 0.62    |
| Rural                                                 | 1.08 (0.57, 2.06)      | 0.81    | 1.34 (0.65, 2.74)    | 0.43    |
| <b>SES at census tract</b>                            |                        |         |                      |         |
| Median income (\$) <sup>a</sup>                       | 1.03 (0.99, 1.07)      | 0.18    | 1.03 (0.97, 1.09)    | 0.39    |
| At least high school diploma (%)                      | 1.00 (0.99, 1.01)      | 0.88    | 1.01 (1.00, 1.02)    | 0.24    |
| Not well spoken English at age 65+ (%)                | 1.005 (0.996, 1.014)   | 0.26    | 1.00 (0.99, 1.02)    | 0.76    |
| Year of diagnosis                                     |                        |         |                      |         |
| 1992–1995 (ref)                                       | 1                      | –       | 1                    | –       |
| 1996–1999                                             | 0.90 (0.67, 1.21)      | 0.47    | 0.79 (0.57, 1.09)    | 0.15    |
| 2000–2002                                             | 0.89 (0.68, 1.17)      | 0.41    | 0.66 (0.49, 0.89)    | 0.01    |
| 2003–2005                                             | 1.74 (1.34, 2.26)      | <0.001  | 1.35 (1.00, 1.81)    | 0.05    |
| <b>High-risk prognostic factors</b>                   |                        |         |                      |         |
| T4                                                    | 1.00 (0.80, 1.27)      | 0.98    | 0.89 (0.69, 1.15)    | 0.36    |
| Poorly differentiated or undifferentiated tumor grade | 1.13 (0.90, 1.41)      | 0.30    | 1.07 (0.83, 1.37)    | 0.60    |
| Obstruction                                           | 1.13 (0.79, 1.62)      | 0.49    | 0.91 (0.61, 1.35)    | 0.62    |
| Perforation                                           | 1.41 (0.96, 2.07)      | 0.08    | 0.97 (0.63, 1.50)    | 0.89    |
| <12 lymph node examined                               | 1.18 (0.98, 1.42)      | 0.08    | 1.19 (0.97, 1.45)    | 0.10    |
| <b>Pre-diagnostic conditions</b>                      |                        |         |                      |         |
| Charlson Index                                        |                        |         |                      |         |
| 0 (ref)                                               | 1                      | –       | 1                    | –       |
| 1                                                     | 1.16 (0.92, 1.46)      | 0.22    | 1.05 (0.81, 1.36)    | 0.72    |
| 2                                                     | 1.72 (1.23, 2.42)      | 0.002   | 1.48 (1.01, 2.19)    | 0.05    |
| 3+                                                    | 1.59 (0.96, 2.64)      | 0.07    | 1.07 (0.58, 1.95)    | 0.83    |
| Hospitalization <sup>b</sup>                          | 1.14 (0.87, 1.48)      | 0.34    | 0.88 (0.65, 1.21)    | 0.44    |

**Table 2.** Cont.

| Characteristics                       | Unadjusted OR (95% CI) | p-value | Adjusted OR (95% CI) | p-value |
|---------------------------------------|------------------------|---------|----------------------|---------|
| Oxygen or wheelchair use <sup>b</sup> | 1.61 (0.83, 3.12)      | 0.16    | 0.98 (0.46, 2.10)    | 0.96    |
| <b>Post-surgical conditions</b>       |                        |         |                      |         |
| Length of hospital stay               |                        |         |                      |         |
| ≤14 days (ref)                        | 1                      | –       | 1                    | –       |
| >14 days                              | 2.17 (1.69, 2.78)      | <0.001  | 1.38 (1.03, 1.84)    | 0.03    |
| Hospital readmission <sup>c</sup>     |                        |         |                      |         |
| 0 (ref)                               | 1                      | –       | 1                    | –       |
| 1                                     | 3.56 (2.85, 4.45)      | <0.001  | 3.23 (2.56, 4.08)    | <0.001  |
| 2+                                    | 15.33 (10.87, 21.62)   | <0.001  | 13.26 (9.20, 19.12)  | <0.001  |

<sup>a</sup>median income at census tract divided by \$10,000 for ease of interpretation.

<sup>b</sup>measured within 1 year prior to cancer diagnosis.

<sup>c</sup>measured after surgery till chemotherapy initiation.

doi:10.1371/journal.pone.0107993.t002

stronger impact on survival than incompleteness of chemotherapy regimen.

New samples were generated from the propensity score matching for overall survival (n = 636), non-cancer-specific survival (n = 464), and cancer-specific survival (n = 464) according to the delayed chemotherapy at the cutoff of 3 months. In the matched samples, the interaction term of delayed and incomplete chemotherapy was not significant, hence was not added in the stratified Cox regressions. Figure 1 shows the 3 Kaplan-Meier survival curves by timing of initiation (≥3 months and <3 months). Due to the design of the matched samples, Log-rank tests

were not appropriate for the group comparison. Therefore, p-values were not shown on the graphs. Timely or moderately delayed group was associated with significantly better survival in overall and cancer-specific analyses, but the association was only borderline significant in non-cancer-specific survival. In the stratified Cox regressions taking pairs of matches into account, delayed group had significantly higher hazards of overall death (HR = 1.75; 95% CI (1.29, 2.37); p-value<0.001) and cancer-specific death (HR = 4.23; 95% CI (2.19, 8.20); p-value<0.001) than timely or moderately delayed group. The impact of delayed chemotherapy was much higher in cancer-specific survival.

**Table 3.** Association of timing of initiation and incompleteness of chemotherapy.

| Timing of initiation of chemotherapy after surgery | Incompletion of chemotherapy OR (95% CI) | p-value |
|----------------------------------------------------|------------------------------------------|---------|
| Unadjusted model (n = 4,209)                       |                                          |         |
| ≤2 months (reference)                              | 1                                        | –       |
| 2–3 months                                         | 1.36 (1.14, 1.61)                        | <0.001  |
| ≥3 months                                          | 2.72 (2.22, 3.33)                        | <0.001  |
| Adjusted model (n = 4,209) <sup>a</sup>            |                                          |         |
| ≤2 months (reference)                              | 1                                        | –       |
| 2–3 months                                         | 1.33 (1.11, 1.59)                        | 0.002   |
| ≥3 months                                          | 2.60 (2.09, 3.24)                        | <0.001  |
| Propensity score matched sample 1 <sup>b</sup>     |                                          |         |
| <2 months (reference)                              | 1                                        | –       |
| ≥2 months                                          | 1.68 (1.40, 2.00)                        | <0.001  |
| Propensity score matched sample 2 <sup>c</sup>     |                                          |         |
| <3 months (reference)                              | 1                                        | –       |
| ≥3 months                                          | 2.45 (1.85, 3.24)                        | <0.001  |

<sup>a</sup>adjusted by age, gender, race, marital status, SEER regions, residential places, median income, % at least.

high school diploma, % not speaking English well or at all at 65 years and older at census tract level,

year of diagnosis, T4 lesions, poorly differentiated or undifferentiated tumor grade, obstruction at disease.

presentation, perforation at disease presentation, <12 lymph nodes examined, Charlson index,

hospitalization or oxygen, wheelchair use within 1 year prior to cancer diagnosis, length of hospital stay after surgery and number of readmission after surgery.

<sup>b</sup>propensity score matching 1:1 on <2 months and ≥2 months with covariates described above.

Conditional logistic regression was fit on the matched sample (n = 1,996).

<sup>c</sup>propensity score matching 1:1 on <3 months and ≥3 months with covariates described above.

Conditional logistic regression was fit on the matched sample (n = 964).

doi:10.1371/journal.pone.0107993.t003

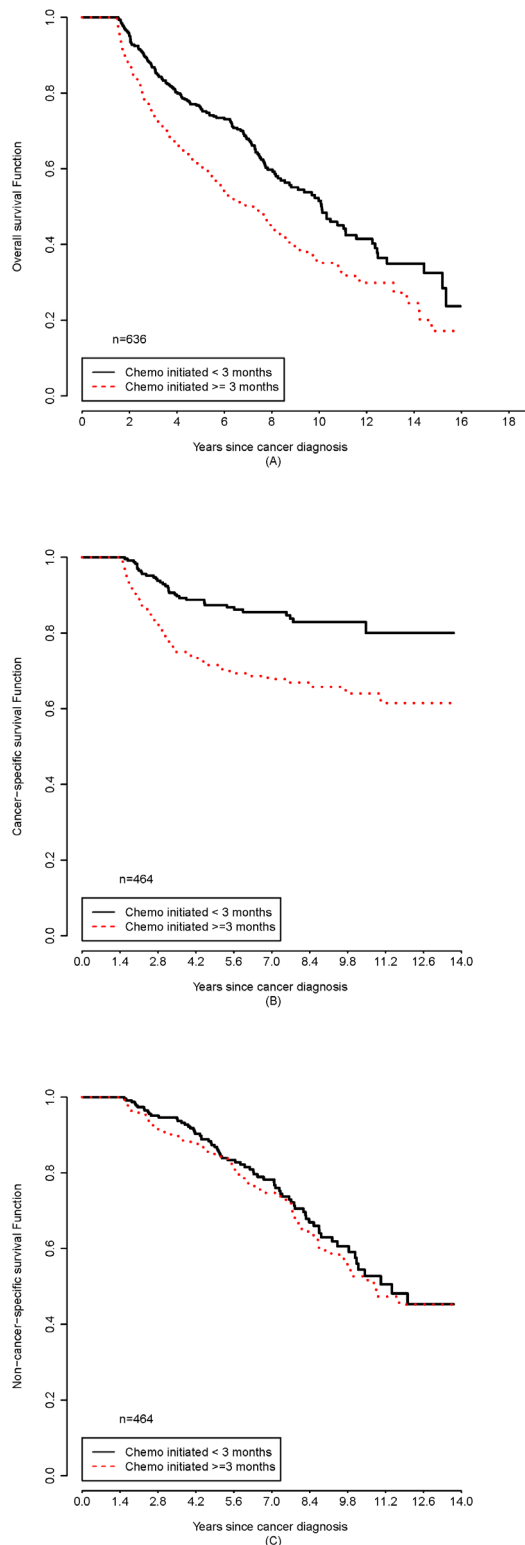

**Figure 1. Kaplan-Meier curves for 3 matched samples from propensity score analysis.** (A): matched sample (n = 636) for overall survival analysis. (B): matched sample (n = 464) for cancer-specific survival analysis. (C): matched sample (n = 464) for non-cancer-specific survival analysis. Due to the matched samples, Log-rank tests were not appropriate to generate p-values for group comparison. Therefore, p-values were not shown on the graphs. Group comparison was based on the models.

doi:10.1371/journal.pone.0107993.g001

Incompletion of chemotherapy had no influence on survival (Table 4).

## Discussion

Very few studies have examined the predictors of delayed chemotherapy in stage II colon cancer patients because the survival benefit on chemotherapy is unclear in this population. Consistent with previous studies, we confirmed that older age, longer hospital stay after surgery, and hospital readmissions were strong predictors of delayed chemotherapy. Our results also showed that African Americans were more likely than the white to delay chemotherapy. Some literature suggested that African Americans were more likely to have an aversion to aggressive treatment or mistrust of the healthcare system or different interpretation of chemotherapy than white [22–24]. We found that regional variation and recent diagnosis were also associated with timing of initiation. It is unknown whether that reflected a true association or was driven by some hidden confounders that were not able to be controlled in the study. Very few studies have reported the associations of high-risk prognostic factors and initiation of chemotherapy. Our results revealed that some of these high-risk factors were not the predictors of initiation of chemotherapy. Rather, age, being black, and complications from surgery were.

In a study that investigated the length of interval and the survival outcomes in stage III colon cancer patients [14], patients who waited over 3 months to initiate chemotherapy had worse overall and cancer-specific survival than those who initiated chemotherapy within 3 months. Another study using stage II and III rectal cancer patients confirmed that those who delayed chemotherapy ( $\geq 3$  months) had worse overall and cancer-specific survival [15], indicating that the delay of treatment was mainly influenced by the postoperative complications, hospital readmission, age and marital status. On the other hand, Dobie and the colleagues found that among the patients with stage III colon cancer who initiated chemotherapy in time, those who didn't complete chemo regimen were older, being unmarried, had postsurgical complications and readmitted to hospital [16]. Another study indicates that patients with stage II and III rectal cancer who completed adjuvant therapy had better cancer-specific survival than those who didn't complete therapy [17]. Some of the risk factors that are associated with the chemotherapy completion are also the factors that are associated with the initiation of chemotherapy. The relationship of treatment initiation and the completion of chemotherapy and the impact of the relationship on survival have not been well studied.

No study has examined the relationship between timing of initiation and completion of chemotherapy. Although delay and incompletion of chemotherapy shared similar characteristics, the association between delayed and incompletion of chemotherapy remained significant, even after controlling and balancing demographics and clinical variables. 5-FU based chemo agents usually have adverse outcomes such as diarrhea, leucopenia, and gastroenteritis [25]. Patients who delayed chemotherapy were generally sicker and thus were more likely to have poor tolerance of chemotoxicity. After the shared characteristics were adjusted, timing became an independent factor of completion of chemotherapy.

It was hypothesized that patients who had delayed and incomplete chemotherapy had worse survival. This was seen in the unadjusted analysis. In the matched samples, the incomplete chemotherapy was not a significant effect modifier, neither was it associated with survival outcomes. Instead, the delayed group was



**Table 4.** Association of delayed chemotherapy ( $\geq 3$  months) and survival in matched samples.

| Variables                                    | HR (95% CI)       | p-value <sup>b</sup> |
|----------------------------------------------|-------------------|----------------------|
| Overall survival (n = 636)                   |                   |                      |
| Delayed chemotherapy <sup>a</sup>            | 1.75 (1.29, 2.37) | <0.001               |
| Incomplete chemotherapy                      | 1.32 (0.83, 2.11) | 0.24                 |
| Colon-cancer-specific survival (n = 464)     |                   |                      |
| Delayed chemotherapy <sup>a</sup>            | 4.23 (2.19, 8.20) | <0.001               |
| Incomplete chemotherapy                      | 1.53 (0.60, 3.91) | 0.38                 |
| Non-colon-cancer-specific survival (n = 464) |                   |                      |
| Delayed chemotherapy <sup>a</sup>            | 1.69 (0.95, 3.01) | 0.07                 |
| Incomplete chemotherapy                      | 1.34 (0.59, 3.07) | 0.49                 |

<sup>a</sup>Chemotherapy initiated  $\geq 3$  months after surgery, reference group is chemotherapy initiated  $< 3$  months after surgery.

<sup>b</sup>comparison based on stratified Cox regression.

Note: all models adjusted for age, gender, Charlson index, length of hospital stays and hospital readmission after surgery. The interaction terms of delayed chemotherapy modified by incomplete chemotherapy were not significant in all the models.

doi:10.1371/journal.pone.0107993.t004

significantly associated with overall survival, especially with cancer-specific survival. Furthermore, the magnitude of the effect of delayed chemotherapy on non-cancer-specific survival was much smaller than that on cancer-specific survival, and the association was not significant, which could be implied that the significant association between delayed chemotherapy and overall survival was mostly driven by cancer-specific survival. Our results were inconsistent with a Canadian study where survival was affected by early discontinuation but not timing of adjuvant therapy [26]. First, our study population was different from theirs (stage III colon and stage II/III rectal cancer patients). Second, their end point was disease-free survival and overall survival. We were unable to assess disease-free survival because the database lacks date for relapse. Most importantly, our results were consistent with many previous studies analyzed in the meta-analyses [7,8].

Although the benefit of chemotherapy is unclear in stage II colon cancer patients, we found that the impact of delayed chemotherapy on inferior survival was similar to stage III colon cancer patients where the role of chemotherapy was well established. Delayed adjuvant therapy causing deleterious survival was not only found in colorectal cancer [14,15] but also in breast cancer [27–29]. Our results implied that the delay may be more likely to be related to cancer-specific survival. One early study showed that the effect of chemotherapy was diminished if its initiation was delayed [30]. A possible explanation is that tumor probably proliferates during the longer interval time. One study showed that the effect of chemotherapy decreased when the interval between surgery and initiation of chemotherapy increased based on experimental animals [31]. Although the benefit of chemotherapy is not obvious in stage II colon cancer patients, our results showed that timing rather than chemotherapy completion was more related to survival outcomes. We used propensity score matching algorithm to reduce bias. Delay itself seems to be an independent factor for adverse cancer-specific survival outcome. Therefore, the other possible explanation is that there are some biological factors of those patients who had delayed chemotherapy that were not able to be measured in the study that were inherently the causal contributors to the inferior survival rather than the single effect of chemotherapy. However, the biological pathway was unable to be determined in our study.

There are some limitations in the study. Patients were only limited to age older than 65 with fee-for-service insurance. Some of the clinical variables were unavailable due to the nature of the data, such as the actual dose and toxicity of the chemotherapy agents [32]. Nonetheless, this is the first population-based study to show the association between delayed and incomplete chemotherapy and the impact of delayed chemotherapy on inferior survivals among stage II colon cancer patients. During the study period, the use of new chemotherapy agents was uncommon among stage II colon cancer patients. We lacked sufficient power to study new agents in this study.

In summary, our study indicated delayed chemotherapy was associated with inferior overall and cancer-specific survivals. Future studies should focus on patients' treatment preferences, social or physical support, ability of compliance, patient influence by physicians, and medical knowledge about adjuvant therapy which could add the contribution to the association between delayed and incomplete chemotherapy. In addition, future clinical investigation should focus on the tumor biology mechanism for patients who have delayed chemotherapy that could cause inferior survivals, especially cancer-specific survival.

## Supporting Information

**File S1** Contains Table S1 and S2.  
(DOCX)

## Acknowledgments

This study used the linked Surveillance, Epidemiology, and End Results (SEER)–Medicare database. We acknowledge the efforts of National Cancer Institute and the Centers for Medicare and Medicaid Services in the creation of the database.

## Author Contributions

Conceived and designed the experiments: FX AR PF SK GC. Performed the experiments: FX GC. Analyzed the data: FX. Contributed reagents/materials/analysis tools: FX AR PF SK GC. Contributed to the writing of the manuscript: FX AR PF SK GC.



## References

- Benson AB 3rd, Schrag D, Somerfield MR, Cohen AM, Figueredo AT, et al. (2004) American Society of Clinical Oncology recommendations on adjuvant chemotherapy for stage II colon cancer. *J Clin Oncol* 22: 3408–3419.
- Engstrom PF, Armoletti JP, Benson AB 3rd, Chen YJ, Choti MA, et al. (2009) NCCN Clinical Practice Guidelines in Oncology: colon cancer. *J Natl Compr Canc Netw* 7: 778–831.
- Poplin EA, Benedetti JK, Estes NC, Haller DG, Mayer RJ, et al. (2005) Phase III Southwest Oncology Group 9415/Intergroup 0153 randomized trial of fluorouracil, leucovorin, and levamisole versus fluorouracil continuous infusion and levamisole for adjuvant treatment of stage III and high-risk stage II colon cancer. *J Clin Oncol* 23: 1819–1825.
- Gray R, Barnwell J, McConkey C, Hills RK, Williams NS, et al. (2007) Adjuvant chemotherapy versus observation in patients with colorectal cancer: a randomised study. *Lancet* 370: 2020–2029.
- Chau I, Norman AR, Cunningham D, Tait D, Ross PJ, et al. (2005) A randomised comparison between 6 months of bolus fluorouracil/leucovorin and 12 weeks of protracted venous infusion fluorouracil as adjuvant treatment in colorectal cancer. *Ann Oncol* 16: 549–557.
- Glimelius B, Dahl O, Cedermark B, Jakobsen A, Bentzen SM, et al. (2005) Adjuvant chemotherapy in colorectal cancer: a joint analysis of randomised trials by the Nordic Gastrointestinal Tumour Adjuvant Therapy Group. *Acta Oncol* 44: 904–912.
- Des Guetz G, Nicolas P, Perret GY, Moreire JF, Uzzan B (2010) Does delaying adjuvant chemotherapy after curative surgery for colorectal cancer impair survival? A meta-analysis. *Eur J Cancer* 46: 1049–1055.
- Biagi JJ, Raphael MJ, Mackillop WJ, Kong W, King WD, et al. (2011) Association between time to initiation of adjuvant chemotherapy and survival in colorectal cancer: a systematic review and meta-analysis. *Jama* 305: 2335–2342.
- O'Connor ES, Greenblatt DY, LoConte NK, Gangnon RE, Liou JI, et al. (2011) Adjuvant chemotherapy for stage II colon cancer with poor prognostic features. *J Clin Oncol* 29: 3381–3388.
- Warren JL, Klabunde CN, Schrag D, Bach PB, Riley GF (2002) Overview of the SEER-Medicare data: content, research applications, and generalizability to the United States elderly population. *Med Care* 40: Iv-3–18.
- Potosky AL, Riley GF, Lubitz JD, Mentmech RM, Kessler LG (1993) Potential for cancer related health services research using a linked Medicare-tumor registry database. *Med Care* 31: 732–748.
- Schrag D, Rifas-Shiman S, Saltz L, Bach PB, Begg CB (2002) Adjuvant chemotherapy use for Medicare beneficiaries with stage II colon cancer. *J Clin Oncol* 20: 3999–4005.
- Obeidat NA, Pradel FG, Zuckerman IH, DeLisle S, Mullins CD (2009) Outcomes of irinotecan-based chemotherapy regimens in elderly Medicare patients with metastatic colorectal cancer. *Am J Geriatr Pharmacother* 7: 343–354.
- Hershman D, Hall MJ, Wang X, Jacobson JS, McBride R, et al. (2006) Timing of adjuvant chemotherapy initiation after surgery for stage III colon cancer. *Cancer* 107: 2581–2588.
- Cheung WY, Neville BA, Earle CC (2009) Etiology of delays in the initiation of adjuvant chemotherapy and their impact on outcomes for Stage II and III rectal cancer. *Dis Colon Rectum* 52: 1054–1063; discussion 1064.
- Dobie SA, Baldwin LM, Dominitz JA, Matthews B, Billingsley K, et al. (2006) Completion of therapy by Medicare patients with stage III colon cancer. *J Natl Cancer Inst* 98: 610–619.
- Dobie SA, Warren JL, Matthews B, Schwartz D, Baldwin LM, et al. (2008) Survival benefits and trends in use of adjuvant therapy among elderly stage II and III rectal cancer patients in the general population. *Cancer* 112: 789–799.
- NIH (1990) NIH consensus conference. Adjuvant therapy for patients with colon and rectal cancer. *Jama* 264: 1444–1450.
- Bradley CJ, Given CW, Dahman B, Fitzgerald TL (2008) Adjuvant chemotherapy after resection in elderly Medicare and Medicaid patients with colon cancer. *Arch Intern Med* 168: 521–529.
- Klabunde CN, Potosky AL, Legler JM, Warren JL (2000) Development of a comorbidity index using physician claims data. *J Clin Epidemiol* 53: 1258–1267.
- Parson LS (2001) Reducing Bias in a Propensity Score Matched-Pair Sample Using Greedy Matching Techniques. *SUGI* 26.
- Gregg J, Curry RH (1994) Explanatory models for cancer among African-American women at two Atlanta neighborhood health centers: the implications for a cancer screening program. *Soc Sci Med* 39: 519–526.
- Powe BD (1995) Fatalism among elderly African Americans. Effects on colorectal cancer screening. *Cancer Nurs* 18: 385–392.
- Shankar S, Selvin E, Alberg AJ (2002) Perceptions of cancer in an African-American community: a focus group report. *Ethn Dis* 12: 276–283.
- Delea TE, Vera-Llonch M, Edelsberg JS, McGarry L, Anton S, et al. (2002) The incidence and cost of hospitalization for 5-FU toxicity among Medicare beneficiaries with metastatic colorectal cancer. *Value Health* 5: 35–43.
- Ahmed S, Ahmad I, Zhu T, Arnold FP, Faiz Anan G, et al. (2010) Early discontinuation but not the timing of adjuvant therapy affects survival of patients with high-risk colorectal cancer: a population-based study. *Dis Colon Rectum* 53: 1432–1438.
- Colleoni M, Price K, Castiglione-Gertsch M, Goldhirsch A, Coates A, et al. (1998) Dose-response effect of adjuvant cyclophosphamide, methotrexate, 5-fluorouracil (CMF) in node-positive breast cancer. *International Breast Cancer Study Group. Eur J Cancer* 34: 1693–1700.
- Hershman DL, Wang X, McBride R, Jacobson JS, Grann VR, et al. (2006) Delay in initiating adjuvant radiotherapy following breast conservation surgery and its impact on survival. *Int J Radiat Oncol Biol Phys* 65: 1353–1360.
- Nurgalieva ZZ, Franzini L, Morgan RO, Vernon SW, Liu CC, et al. (2013) Impact of timing of adjuvant chemotherapy initiation and completion after surgery on racial disparities in survival among women with breast cancer. *Med Oncol* 30: 419.
- Nissen-Meyer R, Kjellgren K, Malmio K, Mansson B, Norin T (1978) Surgical adjuvant chemotherapy: results with one short course with cyclophosphamide after mastectomy for breast cancer. *Cancer* 41: 2088–2098.
- Schabel F (1977) Experimental basis of adjuvant chemotherapy. In SE Salmon and SE Jones (eds): *Adjuvant therapy of cancer*: 3–14.
- Grann VR, Muggia FM (2006) Completion rates of adjuvant chemotherapy for colon cancer: a historical perspective. *J Natl Cancer Inst* 98: 570–571.
